# Supplementary material for: Low Surgical Morbidity and Mortality After Fast-Track Liver Surgery for Colorectal Liver Metastases: A Study of Complications in a High-Volume Centre
Source: Research Square preprint supplement (doi:10.21203/rs.3.rs-101461/v1), 2020-11-05
Supplement: Supplementary file 1 [file 437496663318116512f08860.docx]

# Supplemental table 1: All complications described

| **Infectious complications** |
| --- |
| Pneumonia |
| Candidiasis |
| Septicemia |
| Gastroenteritis |
| Unknown |
| Urinary tract infection |
| Herpes simplex |
| Bacteremia |
|  |
| **Biliary complications** |
| Biliary leak |
| Bile duct stones |
| Biliary absces |
| Fistula to small intestine |
|  |
| **Bleeding** |
| Liver bleeding |
| Hematoma |
| Upper gastrointestinal bleeding |
| Bleeding from drain site |
| Non-specified bleeding |
|  |
| **Cardiopulmonary complication** |
| Atrial fibrillation |
| Circulatory failure |
| Pleuritis |
| Pneumothorax |
| Hypovolemia |
| Vasovagal syncope |
| Cardiac arrest |
| Pleura effusion |
| Bundle branch block |
|  |
| **Liver insufficiency** |
| Low coagulation factor II, VII, X |
| Hypoalbuminemia |
| Hyperammonemia |
| Encephalopathy |
|  |
| **Anemia** |
|  |
| **Gastrointestinal** |
| Obstipation |
| Delayed gastric emptying |
| Total parenteral nutrition |
| Non-infectious diarrhea |
| Dyspepsia |
|  |
| **Wound** |
| Wound infection |
| Wound dehiscence |
| Fascia dehiscence |
| Hematoma |
| Bleeding |
| Seroma |
| Delayed wound healing |
| Pain during suture removal |
|  |
| **Other surgical complication** |
| A. mesenterica superior thrombosis |
| Ileus |
| Hernia |
| Iatrogenic diaphragmatic injury |
|  |
| **Ascites** |
| Drainage |
| Albumin |
| Spironolactone |
|  |
| **Other medical complications** |
| Hyperkalemia |
| Hypokalemia |
| Delirium |
| Impaired bladder emptying |
| Skin itching |
| Shoulder pain |
| Hallucination |
| Allergy |
| Spinal polysynaptic reflexes |
| Phlebitis |
| Pain |
| Hyperzincemia |
| Hyperglycemia |
| Hypoglycemia |
| Opoid poisoning |
| Hypoalbuminemia |

Description and grouping of all complications observed in the population.

# Supplemental table 2: Major versus minor liver surgery

|  | Hepatectomy |  | Univariate |  | Multivariate |  |
| --- | --- | --- | --- | --- | --- | --- |
| Complication | Major | Minor | OR (95% CI) | P | OR (95% CI) | P |
|  | N = 134 | N = 430 |  |  |  |  |
| **Number of complications, mean (SD)** | 1.49 (1.58) | 0.57 (0.92) | 2.0 (1.7-2.5) | <0.001 | 1.5 (1.1-2.0) | **0.012** |
| **Grade 3a or more vs less, n (%)** | 39 (29 %) | 54 (13 %) | 2.9 (1.8-4.5) | <0.001 | 3.9 (1.6-9.7) | **0.003** |
| **Type of complication** |  |  |  |  |  |  |
| Infection, n (%) | 36 (27 %) | 59 (14 %) | 2.3 (1.4-3.7) | **0.001** |  |  |
| Biliary, n (%) | 15 (11 %) | 10 (2 %) | 5.3 (2.4-11.7) | **<0.001** |  |  |
| Post-operative bleeding, n (%) | 2 (1 %) | 5 (1 %) | 1.3 (0.2-6.7) | 0.763 |  |  |
| Cardio-pulmonary, n (%) | 12 (9 %) | 17 (4 %) | 2.4 (1.1-5.0) | **0.022** | 0.3 (0.1-1.1) | 0.073 |
| Liver insufficiency, n (%) | 46 (34 %) | 13 (3 %) | 16.8 (8.5-33.2) | **<0.001** | 9.4 (4.3-20.4) | **<0.001** |
| Anemia, n (%) | 15 (11 %) | 29 (7%) | 1.7 (0.9-3.5) | 0.124 |  |  |
| Gastrointestinal, n (%) | 18 (13 %) | 30 (7 %) | 2.1 (1.2-3.7) | 0.060 |  |  |
| Wound, n (%) | 15 (11 %) | 43 (10 %) | 1.1 (0.6-2.1) | 0.679 | 0.2 (0.1-0.5) | **0.002** |
| Ascites, n (%) | 10 (7 %) | 1 (0 %) | 34.6 (4.4-274.1) | **0.001** | 10.8 (1.1-107.7) | **0.043** |
| Other surgical, n (%) | 3 (2 %) | 5 (1 %) | 1.9 (0.5-8.3) | 0.367 | 0.1 (0.0-0.9) | **0.038** |
| Other medical, n (%) | 13 (10 %) | 21 (5 %) | 2.1 (1.0-4.3) | **0.047** |  |  |

Analysis of major vs minor surgery for differences in complications using in uni- and multivariate logistics regression were done. OR, odds ratio. CI, confidence interval). N, number.
